# Supplementary material
Source: publisher figshare collection journal article supplement (https://acs.figshare.com/ndownloader/files/3882961)
Supplement: Supplementary file 1 [file 3882961]

# **Tunneling Dynamics of the $\text{NH}_3$ ( $\tilde{\text{A}}$ ) State Observed by Time-resolved Photoelectron and H-atom Kinetic Energy Spectroscopies**

Hui Yu,<sup>a</sup> Nicholas L. Evans,<sup>a</sup> Adam S. Chatterley, Gareth M. Roberts,<sup>b</sup> Vasilios G. Stavros<sup>b</sup> and  
Susanne Ullrich<sup>\*a</sup>

<sup>a</sup>*Department of Physics and Astronomy, University of Georgia, Athens, Georgia, 30602, USA*

<sup>b</sup>*Department of Chemistry, University of Warwick, Library Road, Coventry, CV4 7AL, UK*

\*To whom correspondence should be addressed:

e-mail: ullrich@physast.uga.edu

## **Supporting Information**

## SI.1 INTRODUCTION

Contained in this supplementary information are results from time-resolved photoelectron spectroscopy (TR-PES; SI.2) and time-resolved total kinetic energy release spectroscopy (TR-TKER; SI.3) experiments on the first electronic excited state of ammonia,  $\text{NH}_3(\tilde{\text{A}})$ . Presented here is a complete set of transient profiles obtained after UV (204 – 216 nm) excitation of the  $\nu_2' = 0 - 3$  levels of  $\text{NH}_3(\tilde{\text{A}})$ . Details of transient profile production from the raw data and of least-squares fits are contained in the main document. Fit results from plots in this supplementary information section are reported in Tables 2 and 3 of the main text and are used to analyze the photophysics of ammonia. See each figure caption for detailed description.

## SI.2 TIME-RESOLVED PHOTOELECTRON SPECTRA

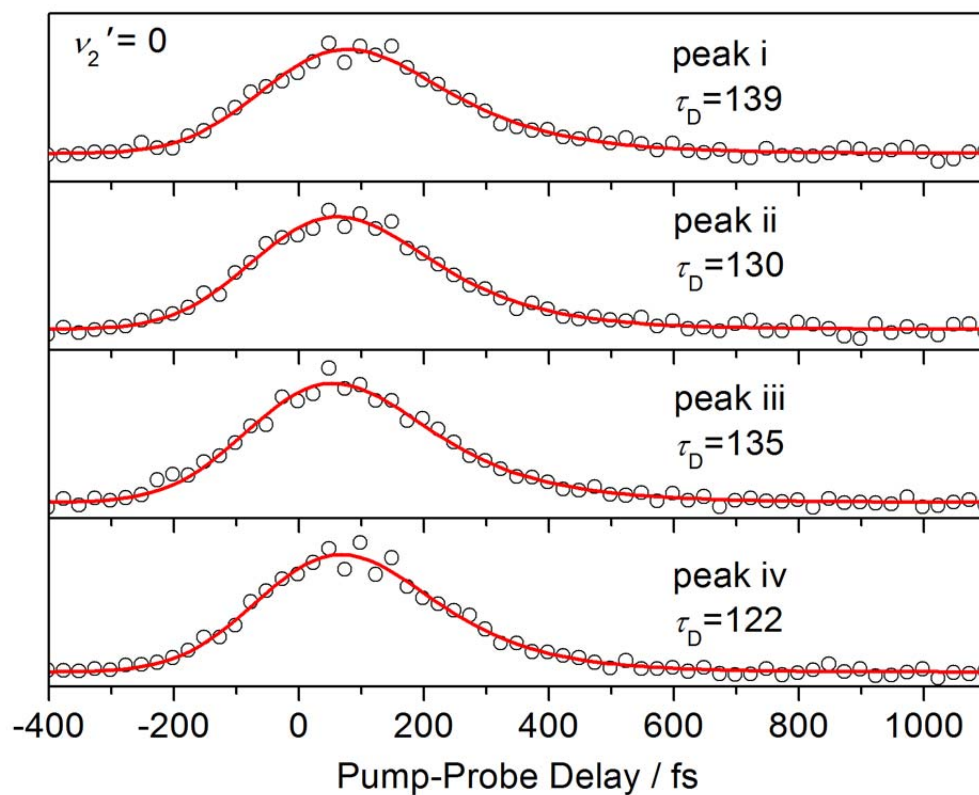

**Figure 1.** Photoelectron transients obtained after 216.4 nm excitation of  $\text{NH}_3$  ( $\tilde{\text{A}}$ )  $\nu_2' = 0$ . Data (circles) and fits (red lines) are shown for four peaks as labeled in Fig. 2 of the main document.

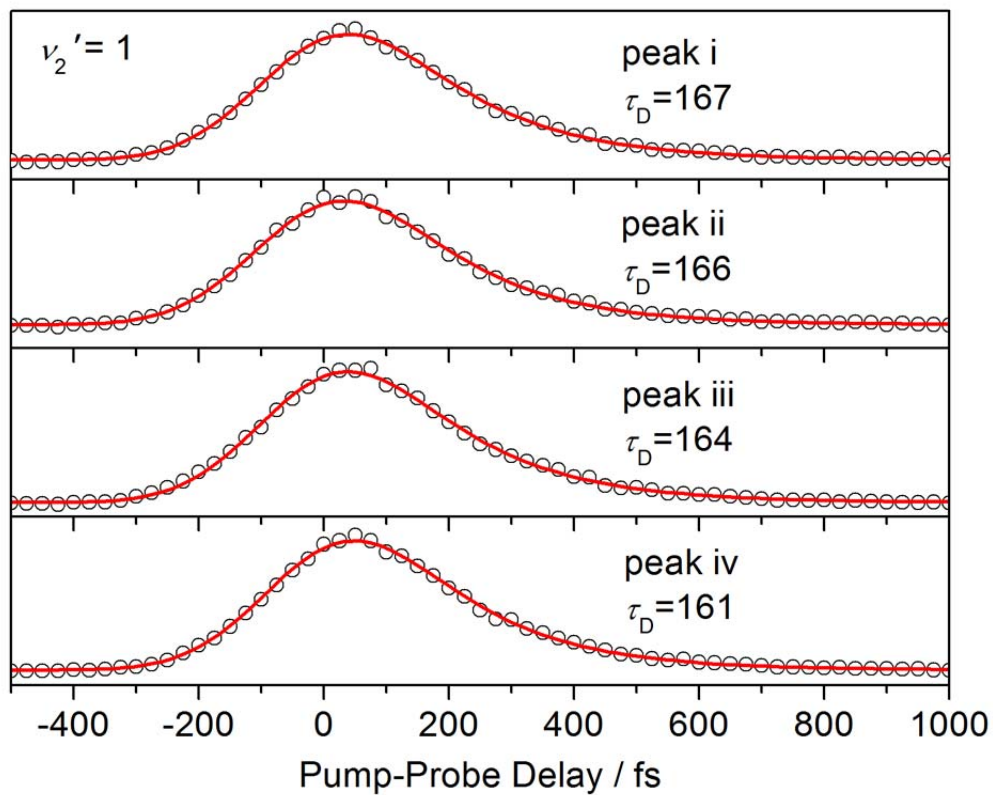

**Figure 2.** Photoelectron transients obtained after 212.6 nm excitation of  $\text{NH}_3$  ( $\tilde{\text{A}}$ )  $\nu_2' = 1$ . Data (circles) and fits (red lines) are shown for four peaks as labeled in Fig. 2 of the main document.

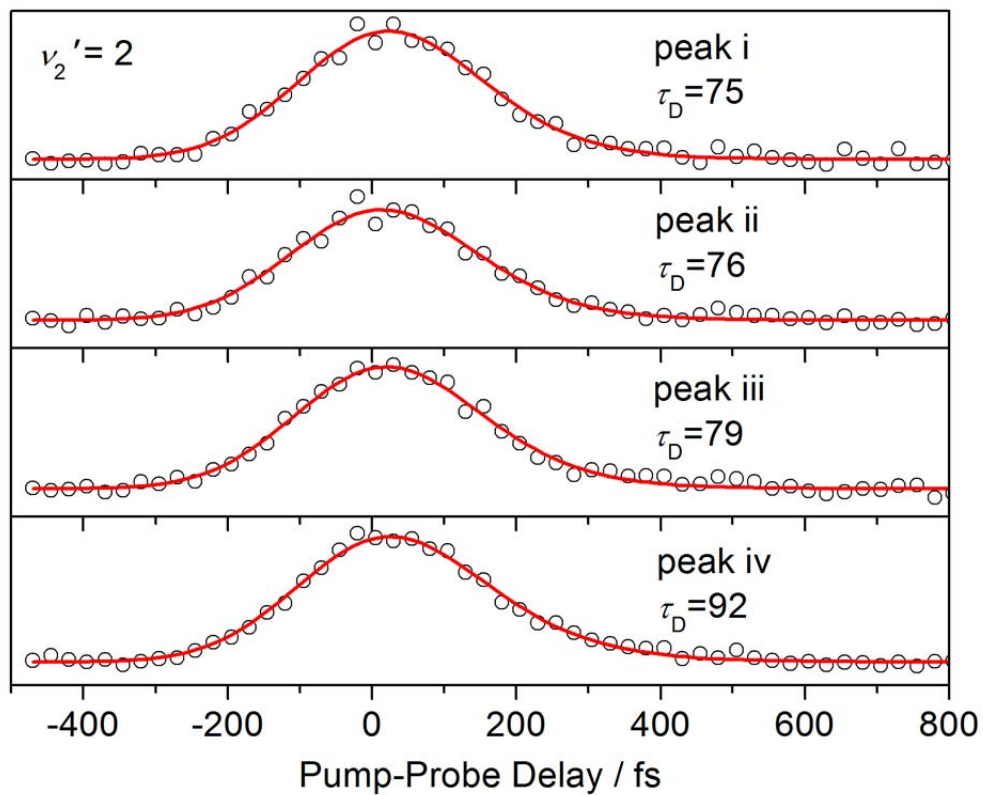

**Figure 3.** Photoelectron transients obtained after 208.5 nm excitation of  $\text{NH}_3$  ( $\tilde{\text{A}}$ )  $\nu_2' = 2$ . Data (circles) and fits (red lines) are shown for four peaks as labeled in Fig. 2 of the main document.

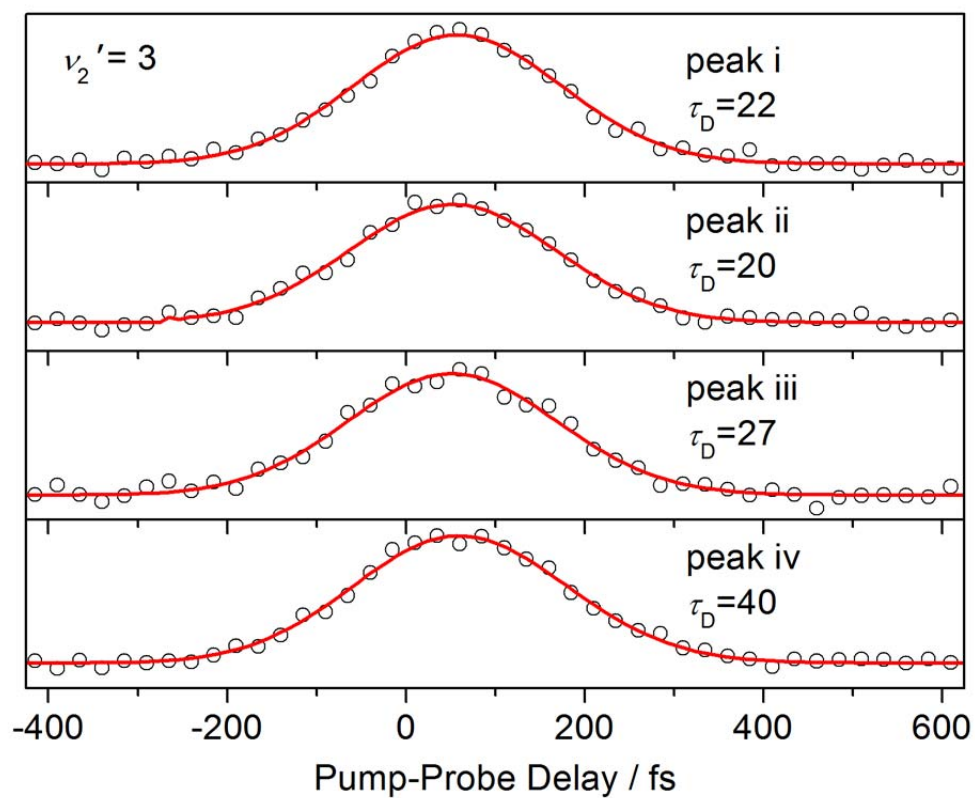

**Figure 4.** Photoelectron transients obtained after 204.6 nm excitation of  $\text{NH}_3$  ( $\tilde{\text{A}}$ )  $\nu_2' = 3$ . Data (circles) and fits (red lines) are shown for four peaks as labeled in Fig. 2 of the main document.

### SI.3 TIME-RESOLVED NH<sub>2</sub> INTERNAL ENERGY SPECTRA

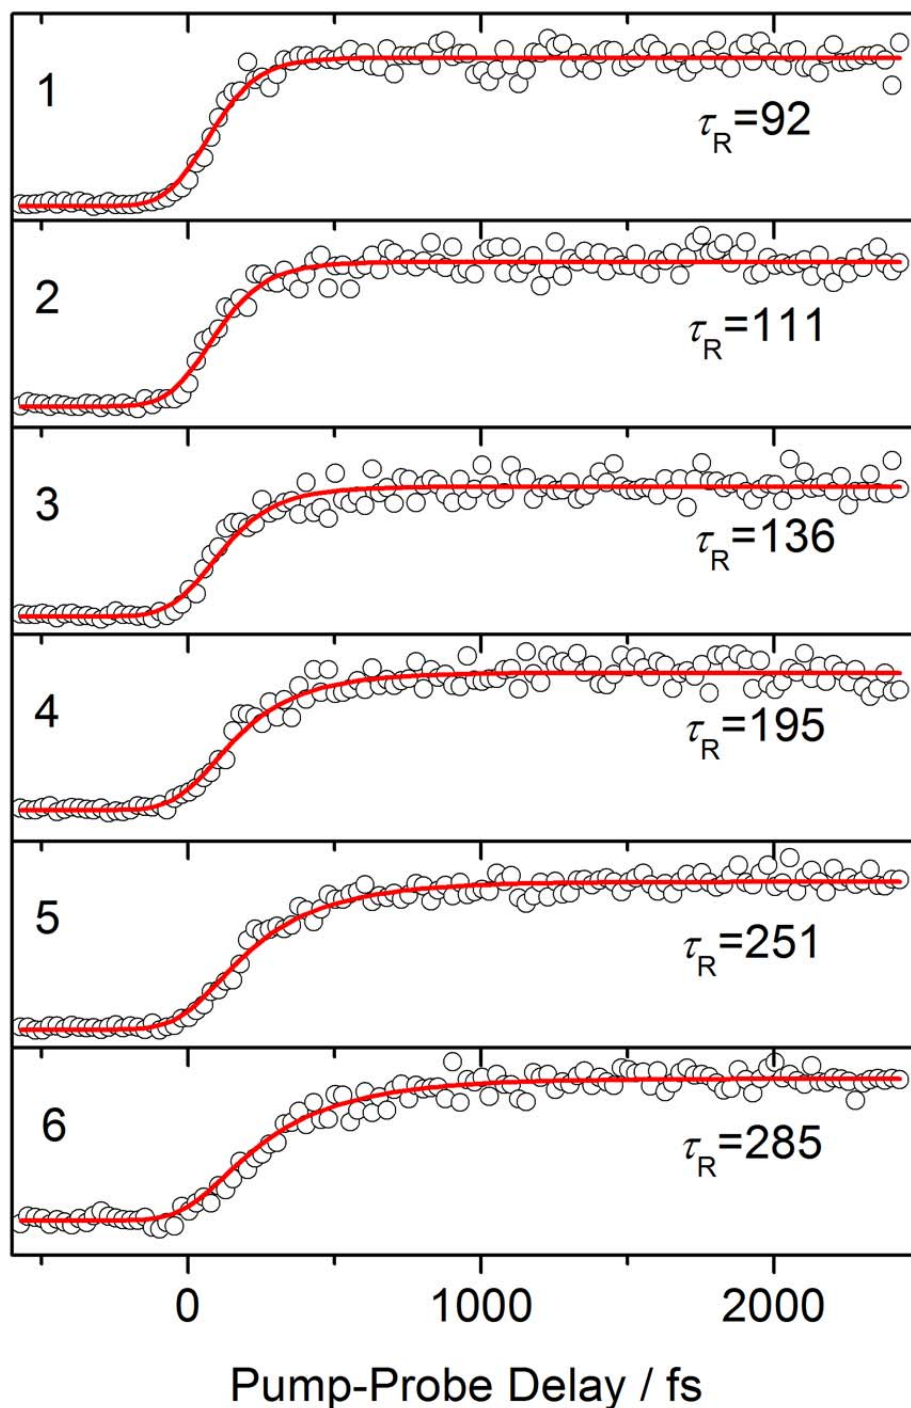

**Figure 5.** Transients obtained after 216.4 nm excitation of NH<sub>3</sub> ( $\tilde{A}$ )  $\nu_2' = 0$ . Data (circles) and fits (red lines) are shown for six regions of the NH<sub>2</sub> internal energy distribution displayed in Fig. 5 of the main document with integration boundaries defined in Table 3. The fit function is an exponential rise convoluted with the IRF and extracted rise constants,  $\tau_R$ , measure the dissociation timescale.

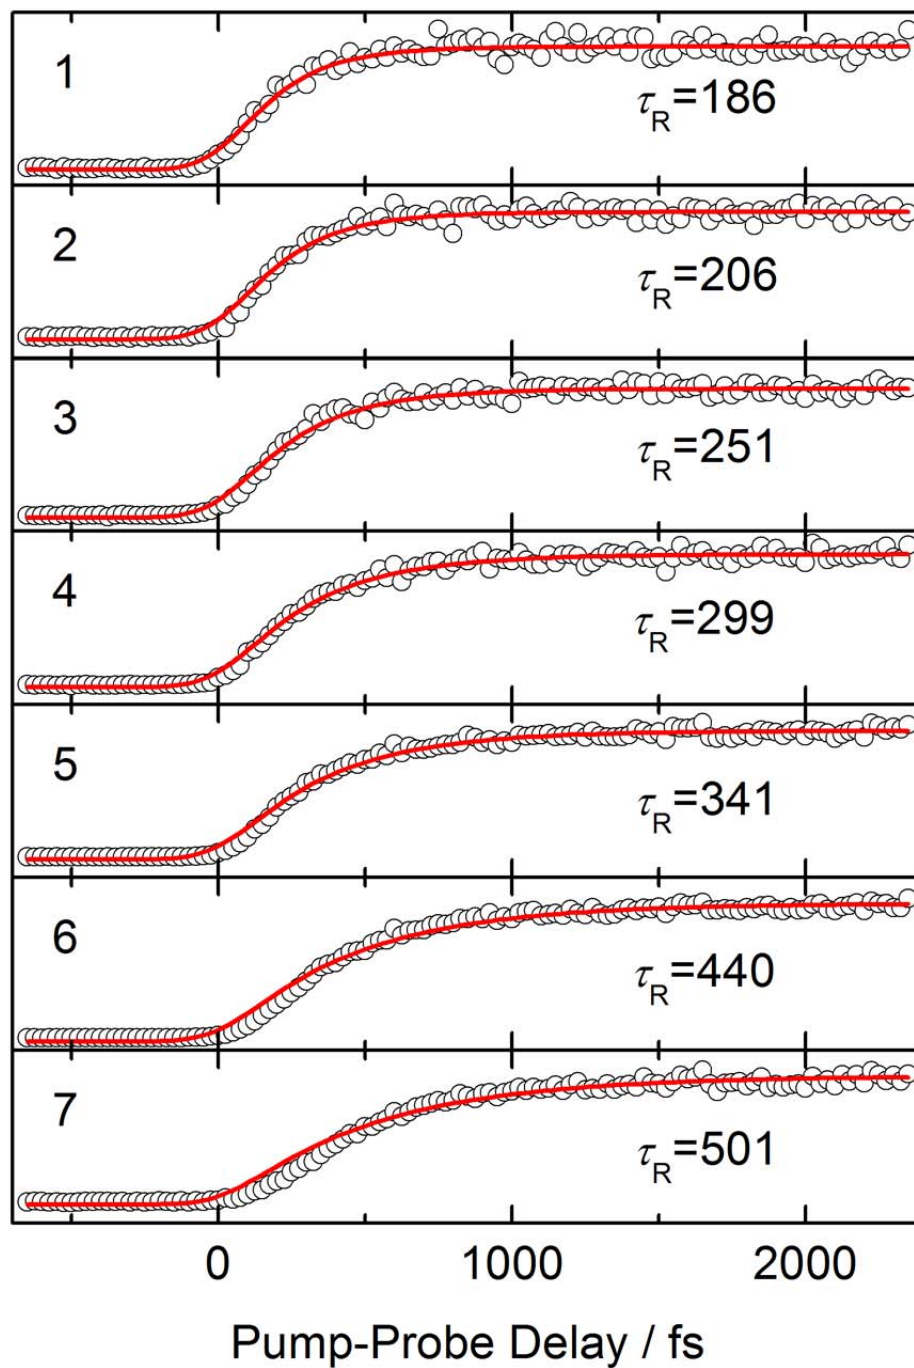

**Figure 6.** Transients obtained after 212.6 nm excitation of  $\text{NH}_3$  ( $\tilde{\text{A}}$ )  $\nu_2' = 1$ . Data (circles) and fits (red lines) are shown for seven regions of the  $\text{NH}_2$  internal energy distribution with integration boundaries defined in Table 3. The fit function is an exponential rise convoluted with the IRF. Extracted rise constants,  $\tau_R$ , measure the dissociation timescale.



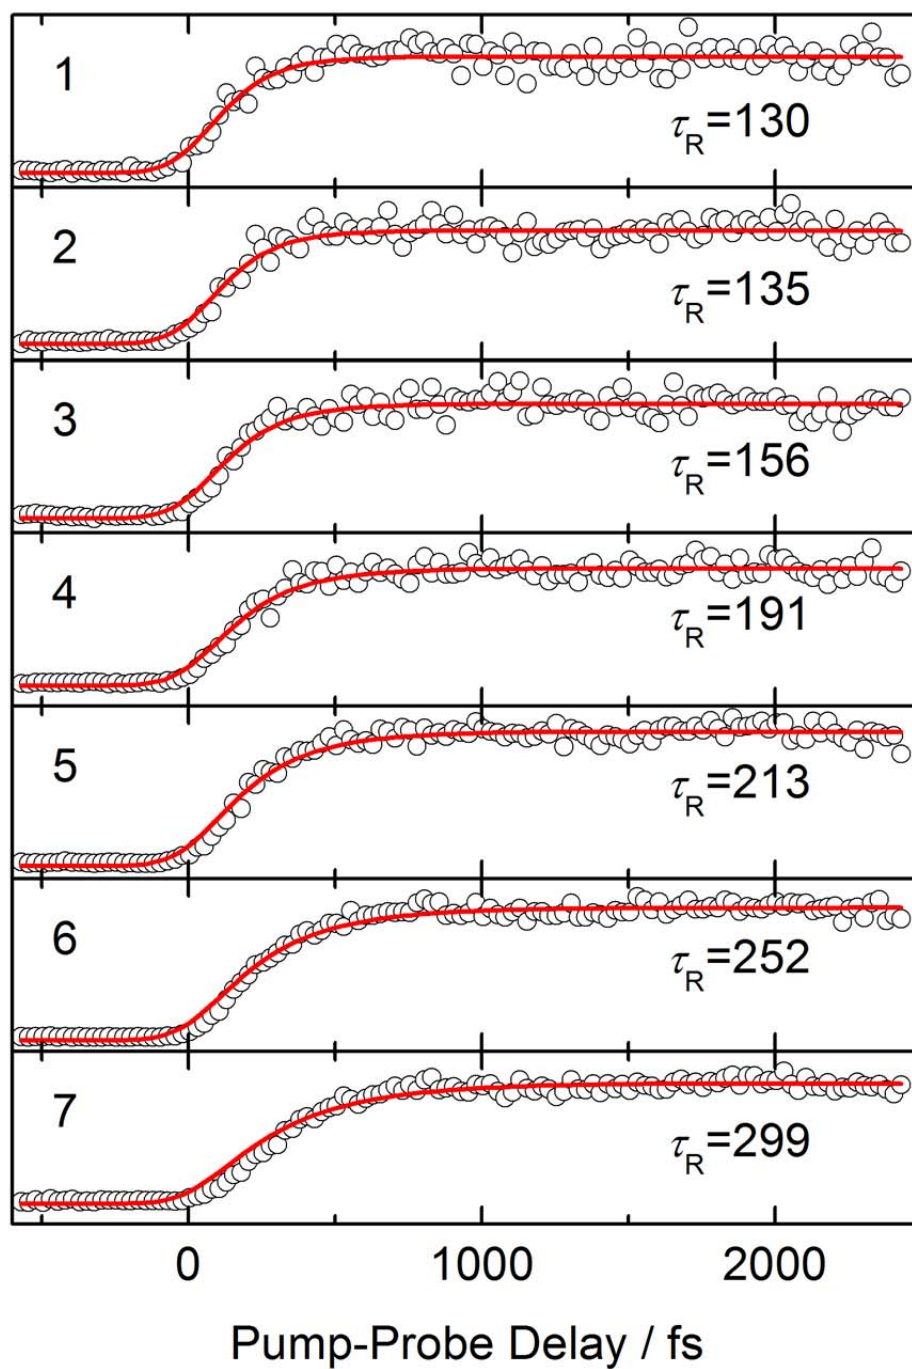

**Figure 7.** Transients obtained after 208.5 nm excitation of  $\text{NH}_3$  ( $\tilde{\text{A}}$ )  $\nu_2' = 2$ . Data (circles) and fits (red lines) are shown for seven regions of the  $\text{NH}_2$  internal energy distribution with integration boundaries defined in Table 3. Fit function is an exponential rise convoluted with the IRF. Extracted rise constants,  $\tau_R$ , measure the dissociation timescale.

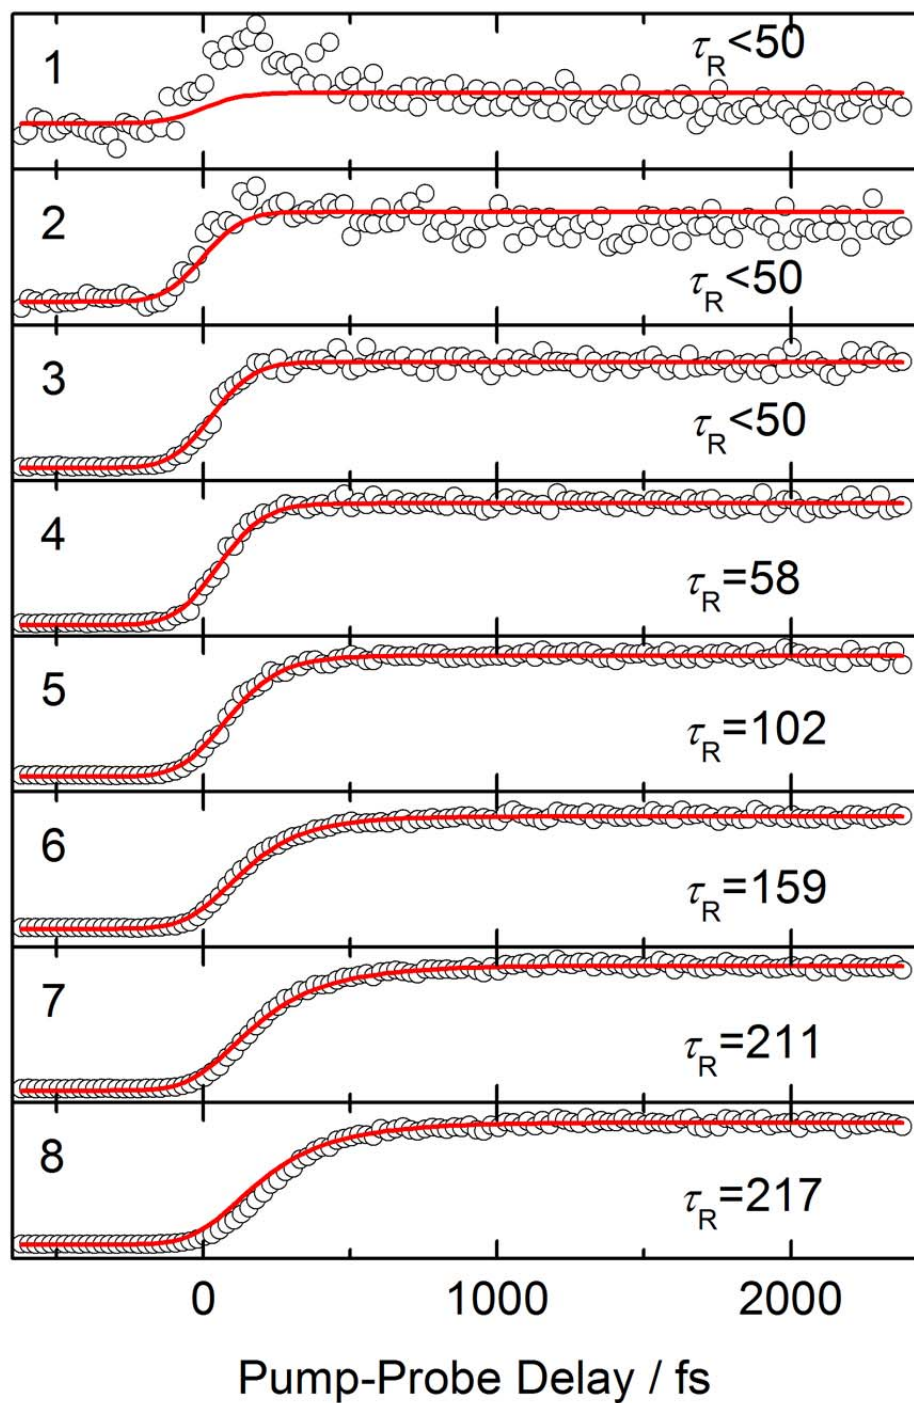

**Figure 8.** Transients obtained after 204.6 nm excitation of  $\text{NH}_3$  ( $\tilde{\text{A}}$ )  $\nu_2' = 3$ . Data (circles) and fits (red lines) are shown for seven regions of the  $\text{NH}_2$  internal energy distribution with integration boundaries defined in Table 3. Fit function is an exponential rise convoluted with the IRF. Extracted rise constants,  $\tau_R$ , measure the dissociation timescale.
